# Supplementary material
Source: publisher figshare collection journal article supplement (https://tandf.figshare.com/ndownloader/files/14518976)

Supporting Information

## **Oxidative Decomposition of Lithium Peroxide Clusters and their Relationship to Charging Potentials in Li-O<sub>2</sub> batteries: An Ab Initio Study**

Rajeev S. Assary and Larry A. Curtiss

Materials Science Division  
Argonne National Laboratories  
Argonne, IL, USA, 60439

Corresponding author: [assary@anl.gov](mailto:assary@anl.gov) (R.SA), 630-252-3536

*Keywords: Oxidative decomposition, Lithium peroxide, Density functional theory, Charge overpotential*

**Figure S1:**  $(\text{Li}_2\text{O}_2)_{16}$  quintet showing HOMO and superoxide moiety on optimized structure

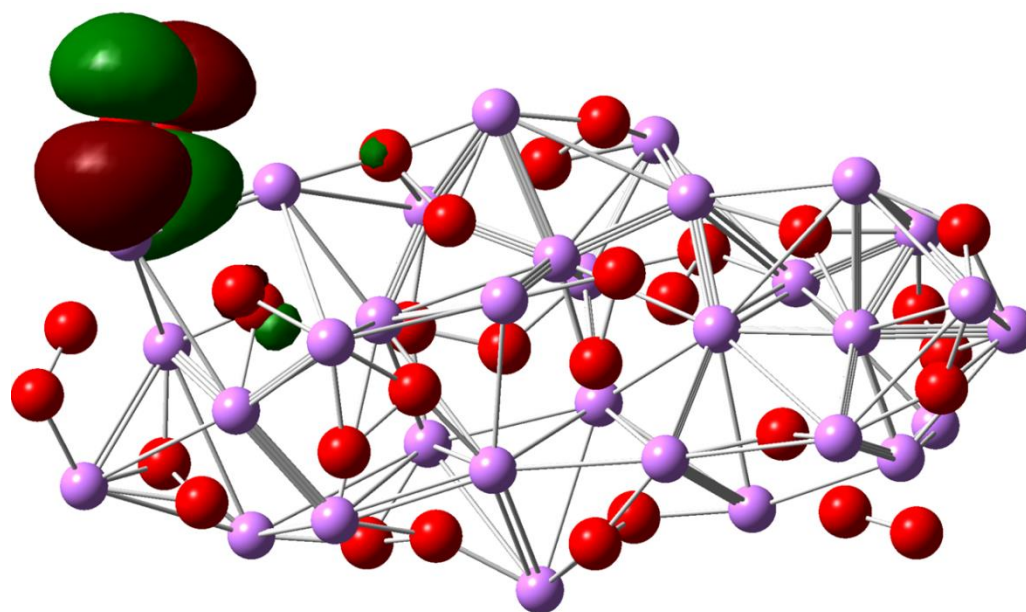

HOMO orbital of  $[\text{Li}_{32}\text{O}_{32}]^{\uparrow\uparrow\uparrow\uparrow}$

Superoxide moiety

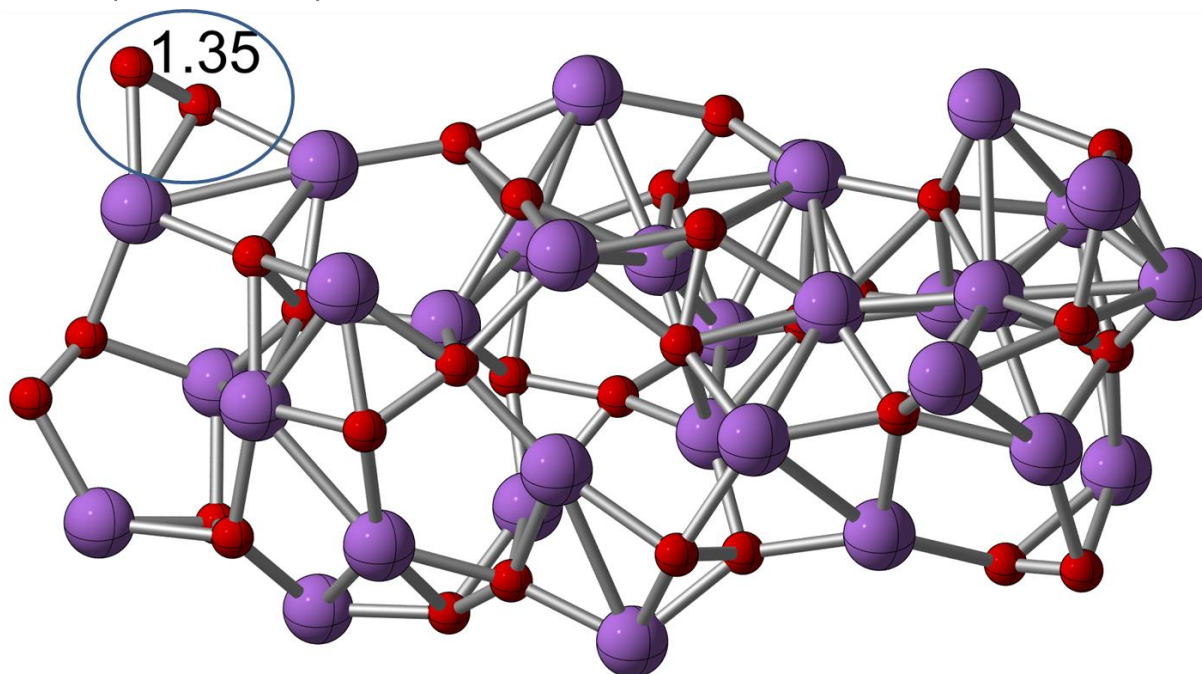

Optimized geometry of  $[\text{Li}_{32}\text{O}_{32}]^{\uparrow\uparrow\uparrow\uparrow}$  cluster

**Fig S2**  $(\text{Li}_2\text{O}_2)_{16}$  cation sextet following oxidation of peroxide unit of  $(\text{Li}_2\text{O}_2)_{16}$  quintet (Fig. S2)

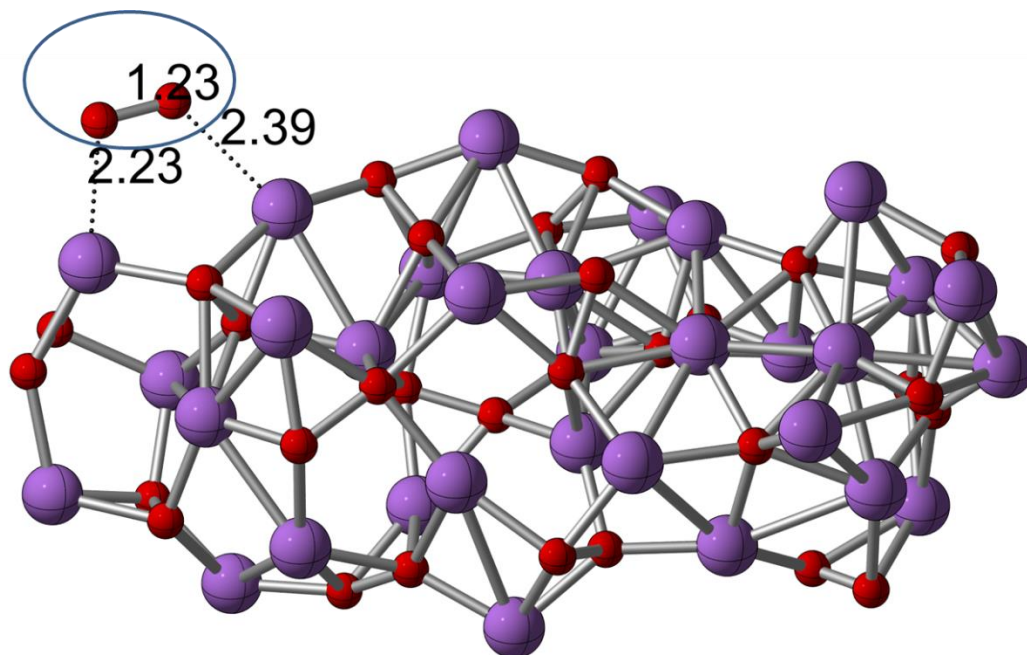

Optimized geometry of  $[\text{Li}_{32}\text{O}_{32}]^{+ \uparrow \uparrow \uparrow \uparrow \uparrow}$  cluster

**Fig S3**  $(\text{Li}_2\text{O}_2)_{16}$  cation quartet following oxidation of superoxide unit of  $(\text{Li}_2\text{O}_2)_{16}$  quintet (Fig. S2)

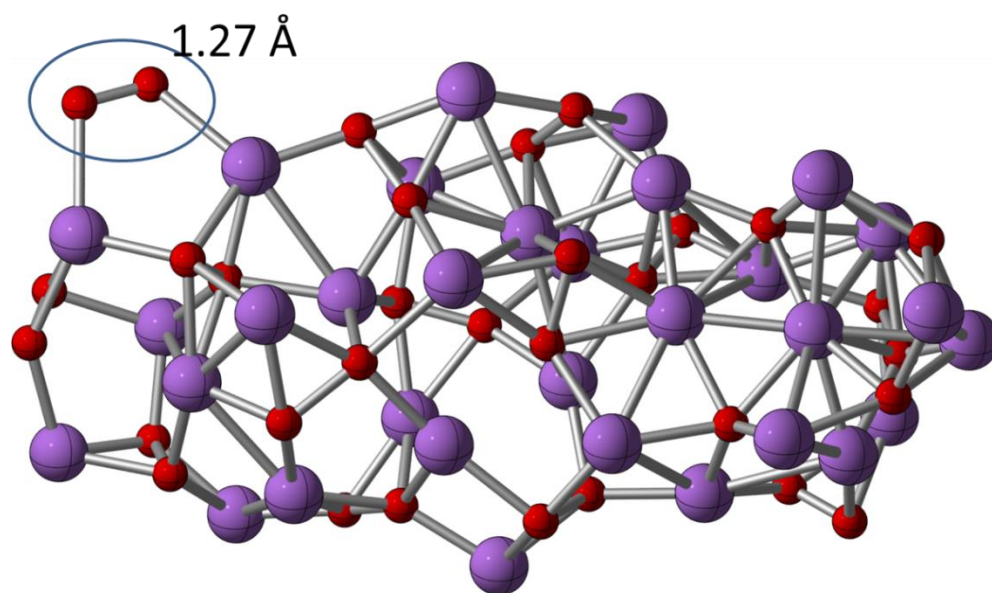

Optimized geometry of  $[\text{Li}_{32}\text{O}_{32}]^{+ \uparrow \uparrow \uparrow}$  cluster

**Fig S4**  $\text{Li}_{32}\text{O}_{30}$  cation following  $\text{O}_2$  removal of from  $(\text{Li}_2\text{O}_2)_{16}$  cation sextet (Fig. S3)

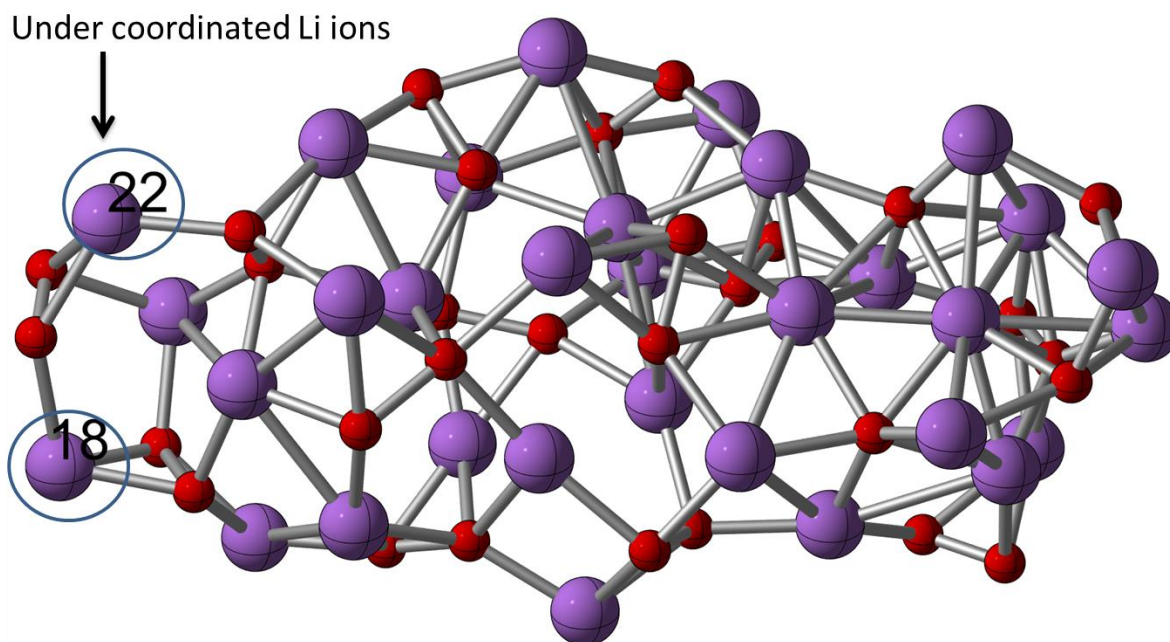

Optimized geometry of  $[\text{Li}_{32}\text{O}_{30}]^{4+}$  cluster

Note : The high-lighted Li ions are under coordinated surface ions are more likely to be removed from the cluster by the solvent molecules (like TEGDME) during charging.

**Fig S5.**  $\text{Li}_{31}\text{O}_{30}$  structure following  $\text{Li}^+$  cation removal from  $\text{Li}_{32}\text{O}_{30}$  cation quartet (Fig. S5)

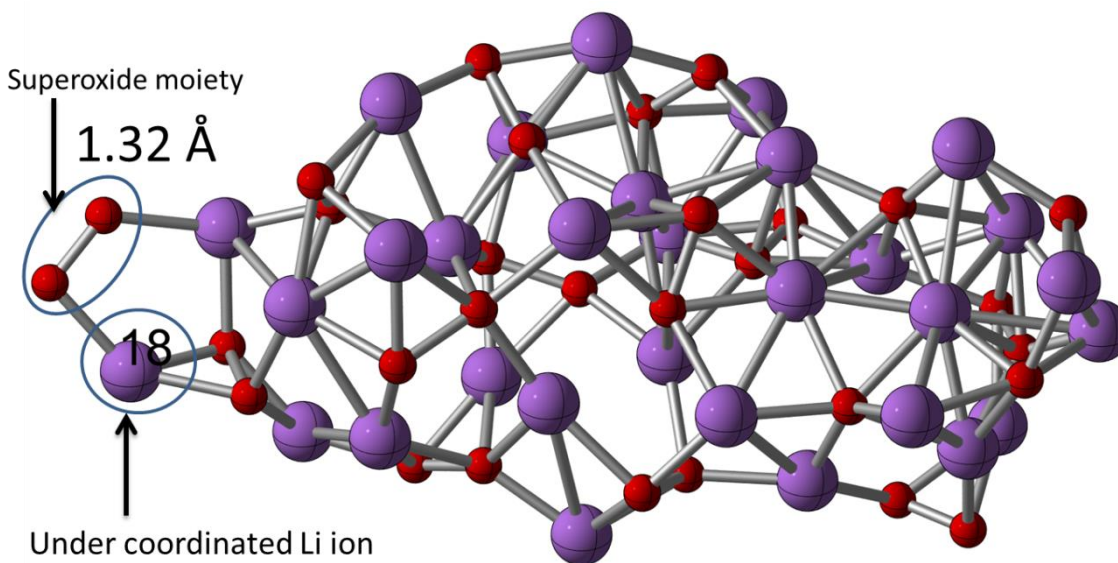

Optimized geometry of  $[\text{Li}_{31}\text{O}_{30}]^{4+}$  cluster



**Fig S6**  $\text{Li}_{31}\text{O}_{30}$  cation following oxidation of  $\text{Li}_{31}\text{O}_{30}$  (Fig. S6)

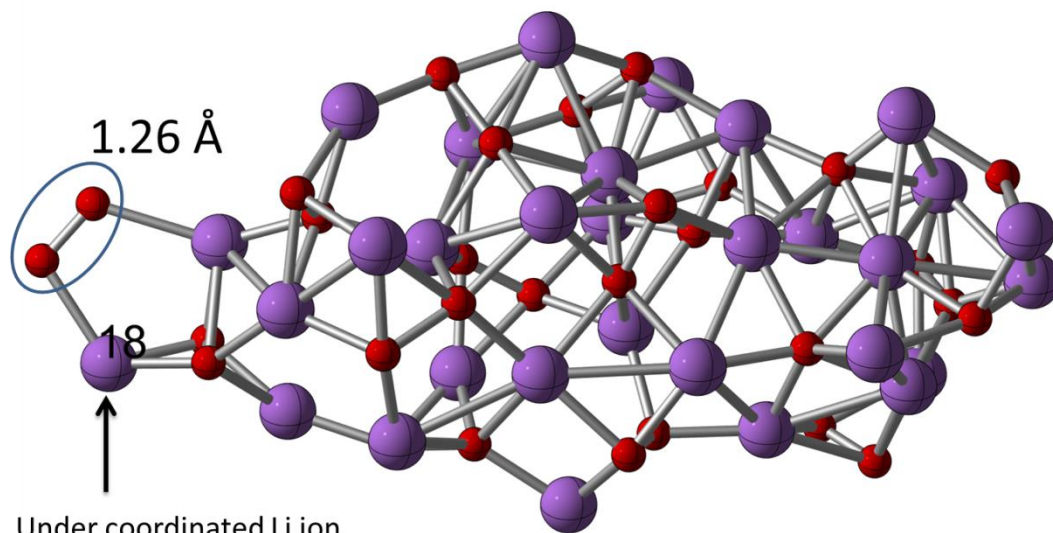

Optimized geometry of  $[\text{Li}_{31}\text{O}_{30}]^{+\uparrow\uparrow\uparrow\uparrow}$  cluster

**Fig. S7**  $\text{Li}_{30}\text{O}_{30}$  structure following  $\text{Li}^+$  cation removal from  $\text{Li}_{32}\text{O}_{30}$  cation quartet (Fig. S5)  
(Note that the structure shown in Fig S8 is a local minimum and the superoxide moieties can make strong covalent bonds with Li ions upon changing the dihedral angles).

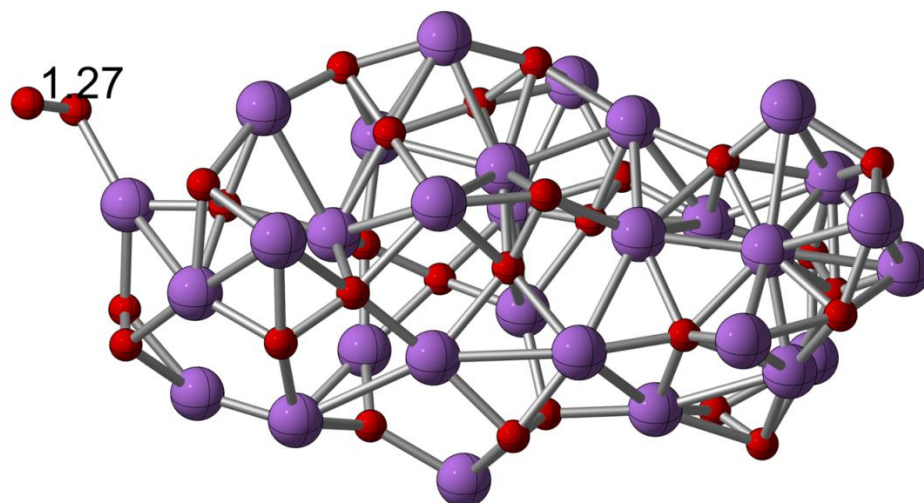

Optimized geometry of  $[\text{Li}_{30}\text{O}_{30}]^{\uparrow\uparrow\uparrow\uparrow}$  cluster

**Figure S8.** Optimized structures of some non-stoichiometric lithium-oxide species computed at the B3LYP/6-31+G(d) level of theory. .

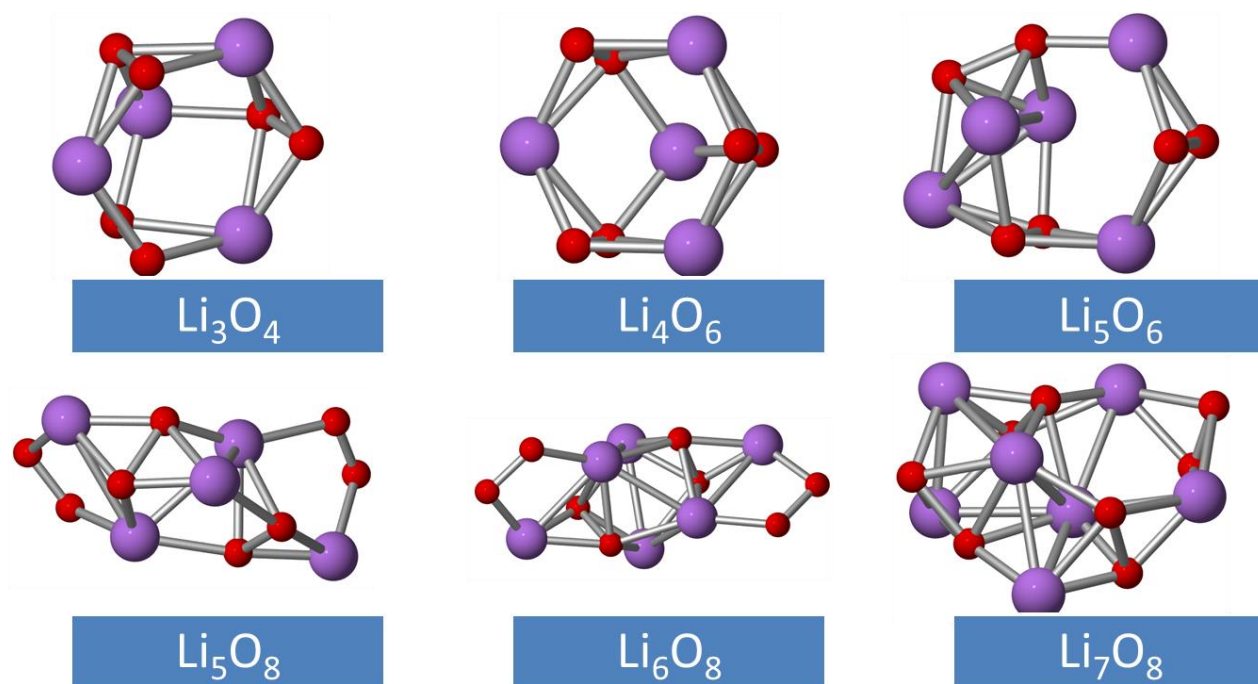

Supplement: Supplementary file 1 [file 14518976]
